# Supplementary material for: Estimating Y-Str Mutation Rates and Tmrca Through Deep-Rooting Italian Pedigrees
Source: PubMed Central journal article supplement (PMC6588691; doi:10.1038/s41598-019-45398-3), 2019-06-21
Supplement: 41598_2019_45398_MOESM1_ESM.pdf [file 41598_2019_45398_MOESM1_ESM.pdf]

# ESTIMATING Y-STR MUTATION RATES AND TMRCA THROUGH DEEP-ROOTING ITALIAN PEDIGREES

Alessio Boattini<sup>1,^,\*</sup>, Stefania Sarno<sup>1,^</sup>, Alessandra M. Mazzarisi<sup>1</sup>, Cinzia Viroli<sup>2</sup>, Sara De Fanti<sup>1</sup>, Carla Bini<sup>3</sup>, Maarten H.D. Larmuseau<sup>4,5</sup>, Susi Pelotti<sup>3,#</sup>, Donata Luiselli<sup>6,#</sup>

<sup>1</sup> Dipartimento di Scienze Biologiche, Geologiche e Ambientali (BiGeA), Università di Bologna, 40126, Bologna, Italy

<sup>2</sup> Dipartimento di Scienze Statistiche "Paolo Fortunati", Università di Bologna, 40126, Bologna, Italy

<sup>3</sup> Dipartimento di Scienze Mediche e Chirurgiche, Università di Bologna, 40126, Bologna, Italy

<sup>4</sup> Laboratory of Forensic Genetics and Molecular Archaeology, Forensic Biomedical Sciences, KU Leuven, B-3000, Leuven, Belgium

<sup>5</sup> Laboratory of Socioecology and Social Evolution, Department of Biology, KU Leuven, B-3000, Leuven, Belgium

<sup>6</sup> Dipartimento di Beni Culturali, Università di Bologna, 48121, Ravenna, Italy

<sup>^</sup> These authors contribute equally to this work

<sup>#</sup> These authors share senior authorship

\*Corresponding author: Alessio Boattini, Department of Biological, Geological and Environmental Sciences, University of Bologna, Via Selmi 3, 40126, Bologna, Italy.

*E-mail address:* alessio.boattini2@unibo.it

## Supplementary Information

Includes Supplementary Figures S1-S3, Supplementary Tables S1-S4, Supplementary Text S1-S2.

## Supplementary Figures

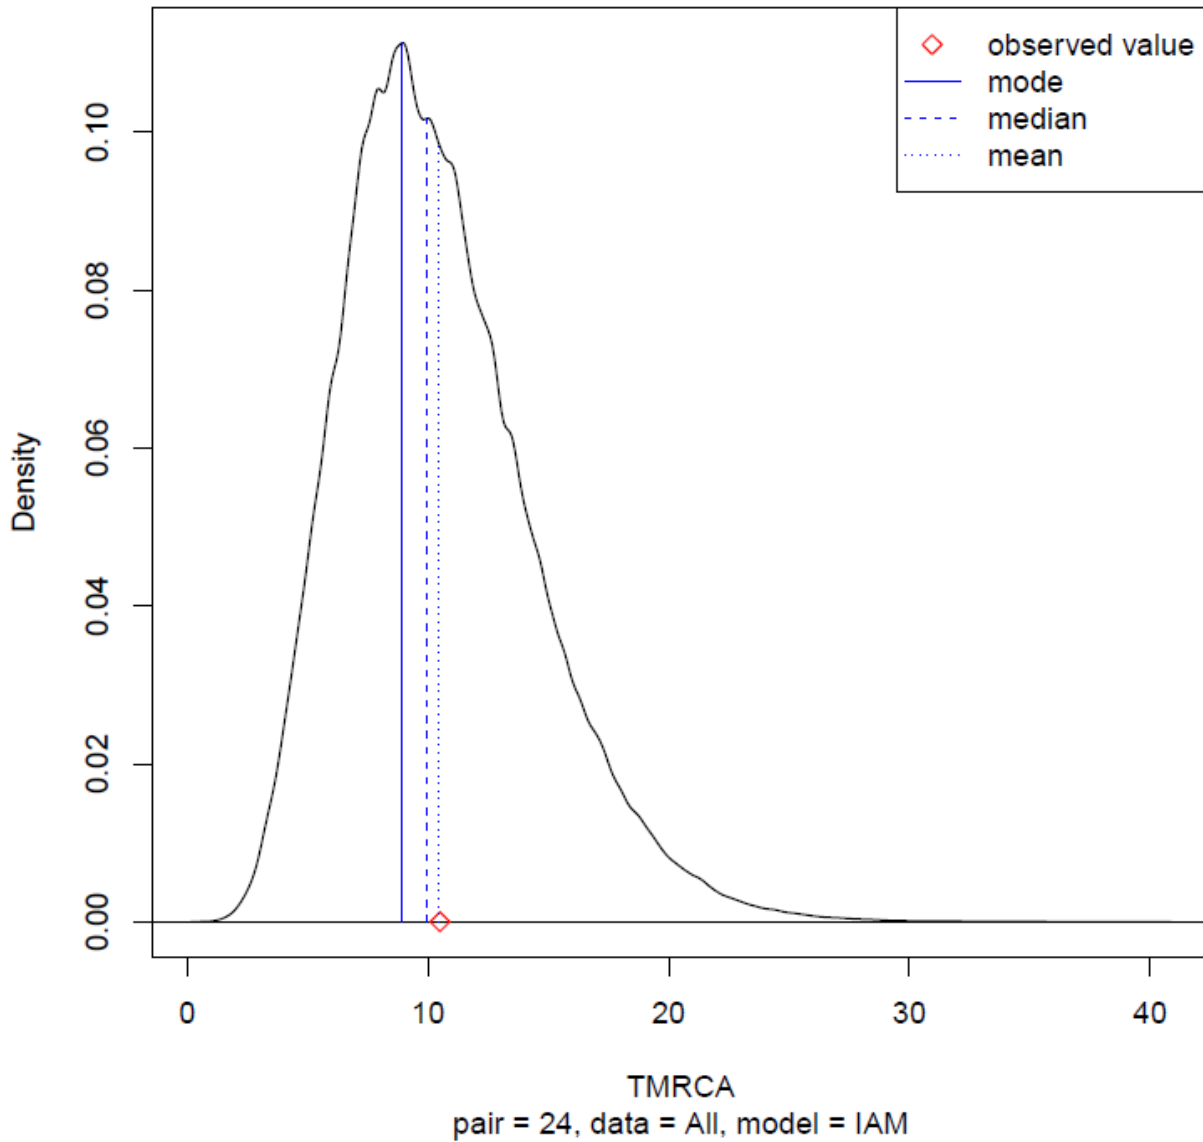

**Supplementary Figure S1.** Example of a posterior distribution of the TMRCA estimated with the Walsh<sup>32</sup> procedure. The distribution is clearly skewed with mean > median > mode.

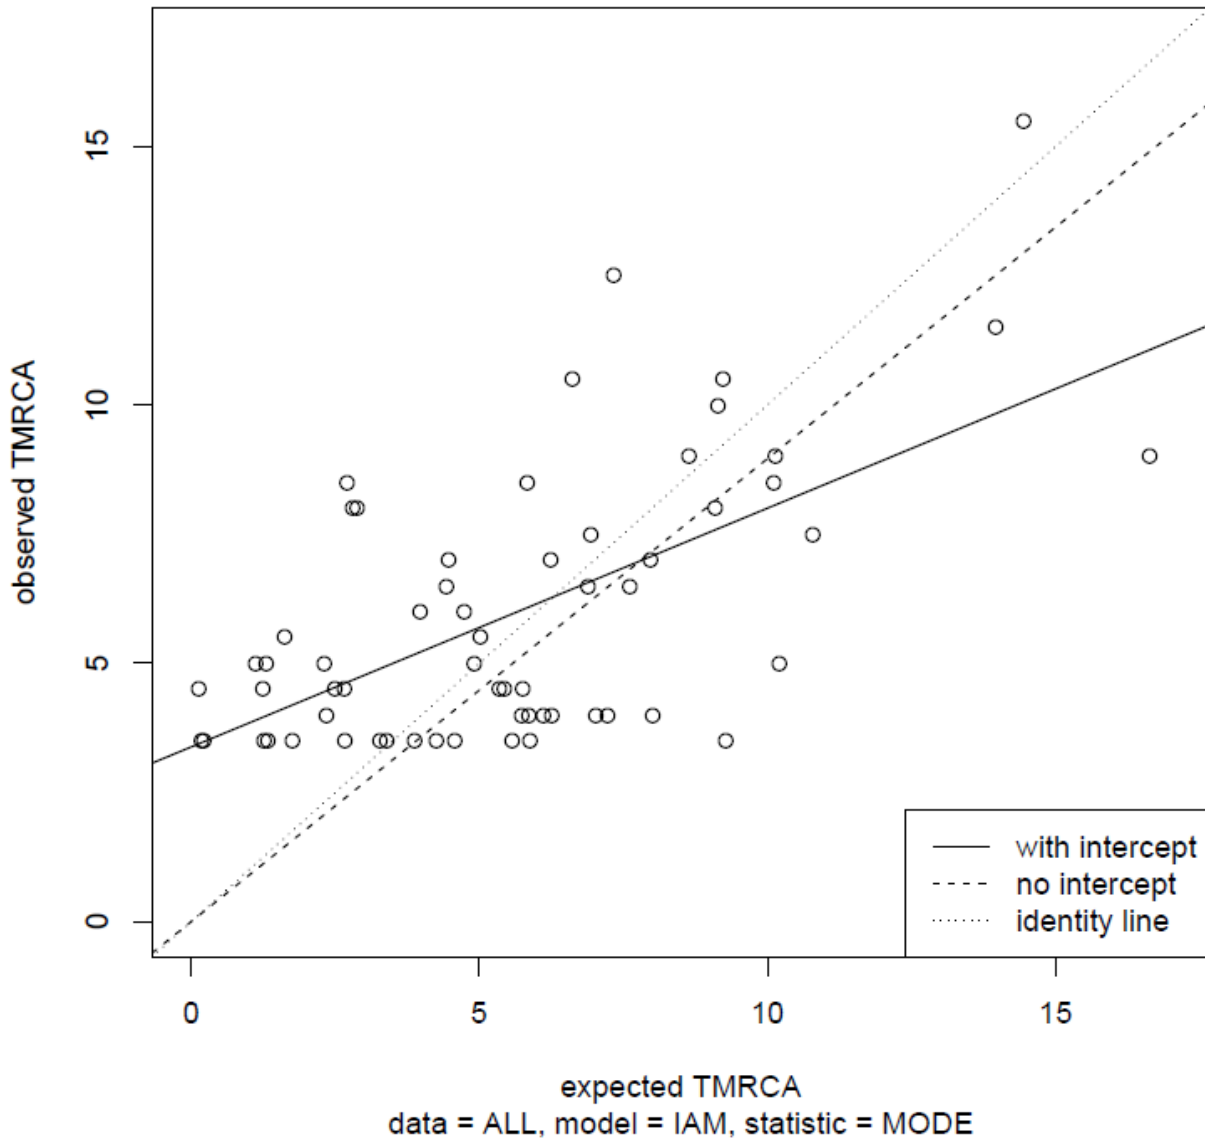

**Supplementary Figure S2.** Linear regressions (with intercept and without intercept) of observed TMRCA against expected TMRCA for the best fitting case, i.e. using the complete dataset (All), the IAM model and the mode as summary statistic.

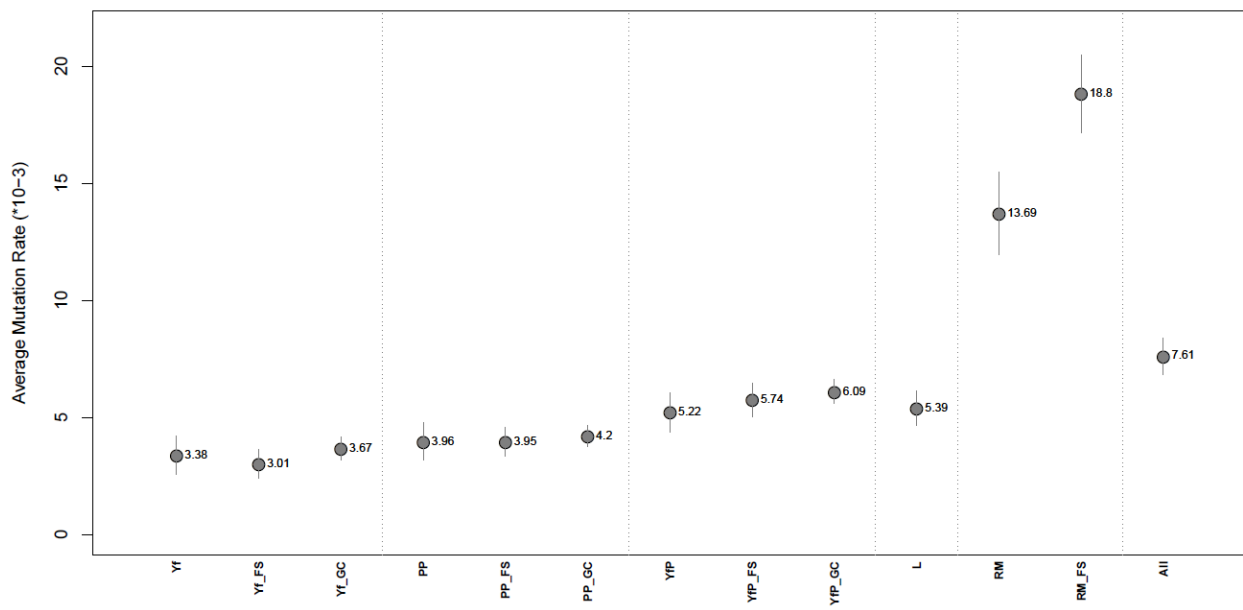

**Supplementary Figure S3.** Overall mutation rates and 95% confidence intervals for the complete dataset and the considered Y-STR panels (abbreviations as in Table 1) compared with reference values. FS = Father-Son pairs<sup>20</sup> GP = Genealogical Pairs<sup>21</sup>.

## Supplementary Tables

Supplementary Tables S1-S4 are provided as an Excel file.

**Supplementary Table S1.** Absolute and relative frequencies of the observed haplogroups in the new sample of 135 individuals belonging to 66 paternal lineages from Emilia Romagna and Veneto.

**Supplementary Table S2.** Numbers of observed mutations for each considered Y-STR in the new sample of 135 individuals belonging to 66 paternal lineages from Emilia Romagna and Veneto (after excluding potential non-paternity events). Multi-step mutations are detailed, as well as the total counts considering all mutations as single events (Single-step) or multi-step mutations as the sum of independent single-step events (Multi-step). SC = Single-copy Y-STR; MC = Multi-copy Y-STR.

**Supplementary Table S3.** Diachronic changes of overall mutation rates and 95% confidence intervals for the complete dataset and the considered Y-STR panels (abbreviations as in Table 1) on three increasing bins of meioses (7-10, 11-19, >19).

**Supplementary Table S4.** Observed TMRCAs (in generations) along with mean, median, mode and 95% confidence intervals of the posterior distributions of estimated TMRCAs using the Walsh<sup>32</sup> procedure. Values are calculated for each of the considered pairs of genealogically related individuals using the complete dataset (All) and the RM and L panels (abbreviations as in Table 1), and fitting the Infinite Alleles Model (IAM) and the Stepwise Mutation Model (SMM). Values in italic correspond to the detected non-paternity events; values in bold correspond to estimates for which the observed value falls outside of the confidence interval.

## Supplementary Text

### Supplementary Text S1. List of the typed Y-SNPs.

|    |       |
|----|-------|
| 1  | L1086 |
| 2  | L1085 |
| 3  | V148  |
| 4  | V168  |
| 5  | M31   |
| 6  | P108  |
| 7  | L419  |
| 8  | V50   |
| 9  | M32   |
| 10 | V42   |
| 11 | M168  |
| 12 | P257  |
| 13 | M174  |
| 14 | M91   |
| 15 | P97   |
| 16 | M42   |
| 17 | M203  |
| 18 | M213  |
| 19 | M45   |
| 20 | M181  |
| 21 | M216  |
| 22 | M9    |
| 23 | M215  |
| 24 | M35   |
| 25 | M78   |
| 26 | M81   |
| 27 | M123  |
| 28 | V6    |
| 29 | P72   |
| 30 | M224  |
| 31 | M136  |
| 32 | V12   |
| 33 | V22   |
| 34 | V65   |
| 35 | M34   |
| 36 | P15   |
| 37 | P16   |
| 38 | P18   |
| 39 | M286  |
| 40 | U8    |
| 41 | U16   |
| 42 | U1    |
| 43 | U13   |
| 44 | M377  |
| 45 | M253  |

|    |       |
|----|-------|
| 46 | M21   |
| 47 | M227  |
| 48 | P109  |
| 49 | P259  |
| 50 | M72   |
| 51 | P215  |
| 52 | P37.2 |
| 53 | M359  |
| 54 | M26   |
| 55 | M161  |
| 56 | M223  |
| 57 | M284  |
| 58 | M379  |
| 59 | P78   |
| 60 | P95   |
| 61 | M267  |
| 62 | M62   |
| 63 | M365  |
| 64 | M390  |
| 65 | P56   |
| 66 | P58   |
| 67 | M367  |
| 68 | M369  |
| 69 | M172  |
| 70 | M410  |
| 71 | M47   |
| 72 | M67   |
| 73 | M68   |
| 74 | M137  |
| 75 | M158  |
| 76 | M289  |
| 77 | M318  |
| 78 | M319  |
| 79 | M339  |
| 80 | M340  |
| 81 | M419  |
| 82 | P81   |
| 83 | P279  |
| 84 | M92   |
| 85 | M327  |
| 86 | M166  |
| 87 | M12   |
| 88 | M205  |
| 89 | M241  |
| 90 | M99   |
| 91 | M280  |
| 92 | M321  |
| 93 | P84   |
| 94 | M20   |
| 95 | M27   |
| 96 | M317  |

97 M357  
98 M242  
99 P36.2  
100 MEH2  
101 M378  
102 SRY10831.2  
103 M17  
104 M56  
105 M157  
106 M287  
107 P98  
108 PK5  
109 M343  
110 P25  
111 M18  
112 P297  
113 M335  
114 M73  
115 M269  
116 P310  
117 U106  
118 P312  
119 M37  
120 M65  
121 M153  
122 SRY2627  
123 M222  
124 U152  
125 P66  
126 M160  
127 M70  
128 L208  
129 M320  
130 P77  
131 Z18  
132 Z381  
133 L48  
134 U198  
135 Z195  
136 M529  
137 L2  
138 L20  
139 M60  
140 M145  
141 M147  
142 M96  
143 M89  
144 M282  
145 M69  
146 M522  
147 M258



|     |      |
|-----|------|
| 148 | M304 |
| 149 | M526 |
| 150 | P308 |
| 151 | P79  |
| 152 | P261 |
| 153 | P256 |
| 154 | M231 |
| 155 | M175 |
| 156 | P202 |
| 157 | P326 |
| 158 | M412 |
| 159 | L11  |
| 160 | M124 |
| 161 | M173 |
| 162 | M207 |
| 163 | M281 |
| 164 | M516 |
| 165 | M479 |
| 166 | V13  |

**Supplementary Text 2.** R script for performing the Walsh<sup>32</sup> procedure with the Infinite Alleles Model (IAM) and the Stepwise Mutation Model (SMM).

The script, along with a short manual and an example dataset, is provided as a supplementary data file named walsh.zip.
